# Supplementary material
Source: PubMed Central journal article supplement (PMC8488565)
Supplement: EMBJ-40-e108126-s001.pdf [file EMBJ-40-e108126-s001.pdf]

## APPENDIX

### Role of endopeptidases in peptidoglycan synthesis mediated by alternative cross-linking enzymes in *Escherichia coli*

Henri Voedts<sup>a</sup>, Delphine Dorchêne<sup>a</sup>, Adam Lodge<sup>b#</sup>, Waldemar Vollmer<sup>b</sup>, Michel Arthur<sup>a+\*</sup>, Jean-Emmanuel Hugonnet<sup>a+\*</sup>

<sup>a</sup> Centre de Recherche des Cordeliers, Sorbonne Université, Inserm, Université de Paris, F-75006 Paris, France; <sup>b</sup> Centre for Bacterial Cell Biology, Biosciences Institute, Newcastle University, Newcastle Upon Tyne, UK; <sup>#</sup> Present address: Iksuda Therapeutics, The Biosphere, Draymans Way, Newcastle Helix, Newcastle upon Tyne, NE4 5BX, UK.

+ Equal contributions

\* Corresponding authors, [michel.arthur@crc.jussieu.fr](mailto:michel.arthur@crc.jussieu.fr); [jean-emmanuel.hugonnet@crc.jussieu.fr](mailto:jean-emmanuel.hugonnet@crc.jussieu.fr)

## TABLE OF CONTENT

Appendix Figure S1. Parallel and serial deletion of endopeptidase genes in *E. coli* BW25113  $\Delta relA$ .

Table S1. Characteristics and origin of the plasmids used in this study

Table S2. Characteristics and origin of *E. coli* strains used in this study



**Table S1. Characteristics and origin of the plasmids used in this study**

| Plasmid                                                                         | Characteristics                                                           | Origin                     |
|---------------------------------------------------------------------------------|---------------------------------------------------------------------------|----------------------------|
| <i>Vectors</i>                                                                  |                                                                           |                            |
| pHV6                                                                            | Tet <sup>R</sup> P <sub>trc</sub> <i>lacI</i> <i>oriV</i> CloDF13         | This study                 |
| pHV7                                                                            | Cm <sup>R</sup> P <sub>araBAD</sub> <i>araC</i> <i>oriV</i> P15a          | This study                 |
| pHV9                                                                            | Zeo <sup>R</sup> P <sub>phIF</sub> <i>phIF</i> <i>oriV</i> pBR322         | This study                 |
| pHV30                                                                           | Zeo <sup>R</sup> P <sub>rhaBAD</sub> TIS1 <i>rhaSR</i> <i>oriV</i> pSC101 | This study                 |
| pET-TEV                                                                         | Km <sup>R</sup> P <sub>T7</sub> <i>lacI</i> <i>oriV</i> ColE1             | (Houben et al., 2007)      |
| pETMM82                                                                         | Km <sup>R</sup> P <sub>T7</sub> <i>dsbC</i> <i>lacI</i> <i>oriV</i> ColE1 | (Firczuk & Bochtler, 2007) |
| <i>Recombinant plasmids for ycbB and relA' expression</i>                       |                                                                           |                            |
| pKT2                                                                            | pHV6Ω <i>ycbB</i>                                                         | (Hugonnet et al., 2016)    |
| pKT8                                                                            | pHV7Ω <i>relA'</i>                                                        | (Hugonnet et al., 2016)    |
| pHV63                                                                           | pHV7Ω <i>ycbB</i>                                                         | This study                 |
| <i>Recombinant plasmids for complementation of endopeptidase gene deletions</i> |                                                                           |                            |
| pHV10.1                                                                         | pHV9Ω <i>mepM</i>                                                         | This study                 |
| pHV10.2                                                                         | pHV9Ω <i>mepM</i> H <sup>393A</sup>                                       | This study                 |
| pHV10.3                                                                         | pHV9Ω <i>mepM</i> Δ936-1224 (ΔLytM domain)                                | This study                 |
| pHV43.1                                                                         | pHV30Ω <i>mepA</i>                                                        | This study                 |
| pHV43.2                                                                         | pHV30Ω <i>mepA</i> H <sup>113A</sup>                                      | This study                 |
| pHV44                                                                           | pHV30Ω <i>mepH</i>                                                        | This study                 |
| pHV45.1                                                                         | pHV30Ω <i>mepK</i>                                                        | This study                 |
| pHV45.2                                                                         | pHV30Ω <i>mepK</i> H <sup>133A</sup>                                      | This study                 |
| pHV46                                                                           | pHV30Ω <i>mepM</i>                                                        | This study                 |
| pHV47.1                                                                         | pHV30Ω <i>mepS</i>                                                        | This study                 |
| pHV47.2                                                                         | pHV30Ω <i>mepS</i> C <sup>94A</sup>                                       | This study                 |
| pHV48                                                                           | pHV30Ω <i>dacB</i>                                                        | This study                 |
| pHV49                                                                           | pHV30Ω <i>pbpG</i>                                                        | This study                 |
| pHV50                                                                           | pHV30Ω <i>ampH</i>                                                        | This study                 |
| pHV53                                                                           | pHV30ΩTIS2- <i>mepM</i>                                                   | This study                 |
| pHV55                                                                           | pHV7Ω <i>mepA</i>                                                         | This study                 |
| pHV56                                                                           | pHV7Ω <i>mepH</i>                                                         | This study                 |
| pHV57                                                                           | pHV7Ω <i>mepK</i>                                                         | This study                 |
| pHV58                                                                           | pHV7Ω <i>mepM</i>                                                         | This study                 |
| pHV59                                                                           | pHV7Ω <i>mepS</i>                                                         | This study                 |
| pHV60                                                                           | pHV7Ω <i>dacB</i>                                                         | This study                 |
| pHV61                                                                           | pHV7Ω <i>pbpG</i>                                                         | This study                 |
| pHV62                                                                           | pHV7Ω <i>ampH</i>                                                         | This study                 |
| <i>Recombinant plasmids for protein production</i>                              |                                                                           |                            |
| pET-TEVΩ <i>mepM</i> Δ1-120                                                     | Production of MepM Δ1-40                                                  | This study                 |
| pETMM82Ω <i>mepH</i> Δ1-81                                                      | Production of MepH Δ1-27                                                  | This study                 |
| pETMM82Ω <i>mepS</i> Δ1-72                                                      | Production of MepS Δ1-24                                                  | This study                 |
| pET21bΩ <i>dacB</i> Δ1-60                                                       | Production of PBP4 Δ1-20                                                  | (Banzhaf et al., 2020)     |
| pET28aΩ <i>pbpG</i> Δ1-75                                                       | Production of PBP7 Δ1-25                                                  | (Banzhaf et al., 2020)     |

**Table S2. Characteristics and origin of *E. coli* strains used in this study**

| Strain                                | Characteristics                                                                                                            | Origin                  |
|---------------------------------------|----------------------------------------------------------------------------------------------------------------------------|-------------------------|
| BW25113                               | $\Delta(araD-araB)567 \Delta(rhaD-rhaB)568$<br>$\Delta lacZ4787 (::rrnB-3) hsdR514 rph-1$                                  | (Baba et al., 2006)     |
| BW25113( <i>ycbB</i> , <i>relA'</i> ) | $\Delta relA$ derivative of BW25113 harboring pKT2( <i>ycbB</i> ) and pKT8( <i>relA'</i> )                                 | (Hugonnet et al., 2016) |
| BW25113 M1                            | Ampicillin resistant derivative of BW25113 pJEH12( <i>ycbB</i> ) harboring a mutation in the 5' UTR region of <i>ileRS</i> | (Hugonnet et al., 2016) |
| BL21(DE3)                             | Host for protein production                                                                                                | (Wood, 1966)            |

## REFERENCES

- Baba, T., Ara, T., Hasegawa, M., Takai, Y., Okumura, Y., Baba, M., Datsenko, K. A., Tomita, M., Wanner, B. L., & Mori, H. (2006). Construction of *Escherichia coli* K-12 in-frame, single-gene knockout mutants: the Keio collection. *Molecular Systems Biology*, 2(1). <https://doi.org/10.1038/msb4100050>
- Banzhaf, M., Yau, H. C., Verheul, J., Lodge, A., Kritikos, G., Mateus, A., Cordier, B., Hov, A. K., Stein, F., Wartel, M., Pazos, M., Solovyova, A. S., Breukink, E., van Teeffelen, S., Savitski, M. M., den Blaauwen, T., Typas, A., & Vollmer, W. (2020). Outer membrane lipoprotein NlpI scaffolds peptidoglycan hydrolases within multi-enzyme complexes in *Escherichia coli*. *The EMBO Journal*, 39(5). <https://doi.org/10.15252/embj.2019102246>
- Datsenko, K. A., & Wanner, B. L. (2000). One-step inactivation of chromosomal genes in *Escherichia coli* K-12 using PCR products. *Proceedings of the National Academy of Sciences of the United States of America*, 97(12), 6640–6645. <https://doi.org/10.1073/pnas.120163297>
- Firczuk, M., & Bochtler, M. (2007). Mutational analysis of peptidoglycan amidase MepA. *Biochemistry*, 46(1), 120–128. <https://doi.org/10.1021/bi0613776>
- Houben, K., Marion, D., Tarbouriech, N., Ruigrok, R. W. H., & Blanchard, L. (2007). Interaction of the C-Terminal Domains of Sendai Virus N and P Proteins: Comparison of Polymerase-Nucleocapsid Interactions within the Paramyxovirus Family. *Journal of Virology*, 81(13), 6807–6816. <https://doi.org/10.1128/jvi.00338-07>
- Hugonnet, J. E., Mengin-Lecreulx, D., Monton, A., den Blaauwen, T., Carbonnelle, E., Veckerlé, C., Yves, V. B., van Nieuwenhze, M., Bouchier, C., Tu, K., Rice, L. B., & Arthur, M. (2016). Factors essential for L,D-transpeptidase-mediated peptidoglycan cross-linking and  $\beta$ -lactam resistance in *Escherichia coli*. *ELife*, 5(OCTOBER2016). <https://doi.org/10.7554/eLife.19469>
- Wood, W. B. (1966). Host specificity of DNA produced by *Escherichia coli*: Bacterial mutations affecting the restriction and modification of DNA. *Journal of Molecular Biology*, 16(1), 118–133. [https://doi.org/10.1016/S0022-2836\(66\)80267-X](https://doi.org/10.1016/S0022-2836(66)80267-X)
